# Supplementary material
Source: HighWire-hosted journal article supplement (doi:10.1101/rna.078824.121)
Supplement: Supplemental_Material.docx [file Supplemental_Material.docx]

**Supplementary Material:**

**An uncommon [K+(Mg2+)2]****metal ion triad imparts stability and selectivity to the Guanidine-I riboswitches**

Robert J. Trachman III* & Adrian R. Ferré-D’Amaré

Biochemistry and Biophysics Center, National Heart, Lung, and Blood Institute, 50 South Drive MSC 8012, Bethesda, MD 20892-8012, USA

*Address correspondence to R.J.T., robert.trachman@nih.gov

**Supplementary Table 1. Summary of crystallographic statistics**

|  | **Burkholderia sp. TJI49 *ykkC-*I** |
| --- | --- |
| **Data collection** |  |
| Space group | *P*3*2*21 |
| Cell dimensions |  |
| *a*, *b*, *c* (Å)  **, **, ** | 51.7, 51.7, 266.7  90, 90, 90 |
|  |  |
| Resolution (Å) | 7.00 – 2.70 (2.85 – 2.70)a |
| *R*merge | 0.07 (0.73) |
| *R*pim | 0.02 (0.24) |
| *<I>* / <*I)>* | 25.7 (4.1) |
| *CC*1/2 | 0.99 (0.92) |
| Completeness (%) | 98.0 (99.6) |
| Redundancy | 18.2 (18.3) |
| **Refinement** |  |
| Resolution (Å) | 7.0 – 2.70 (2.85 – 2.70) |
| No. reflections | 11350 (936) |
| *R*work / *R*free | 21.85 / 27.10 |
| No. atoms | 2739 |
| RNA | 2709 |
| Guanidine | 4 |
| Ions | 21 |
| Water | 4 |
| *B*-factors (Å2) | 89.53 |
| RNA | 89.31 |
| Guanidine | 56.03 |
| Ions | 75.8 |
| Water | 75.32 |
| R.m.s deviations |  |
| Bond lengths (Å) | 0.006 |
| Bond angles (°) | 1.10 |
| Coord. Precisionb (Å) | 0.37 |

aValues in parentheses are for highest-resolution shell.One crystal was used for each data set.

bCalculated by Maximum Likelihood Estimation

**
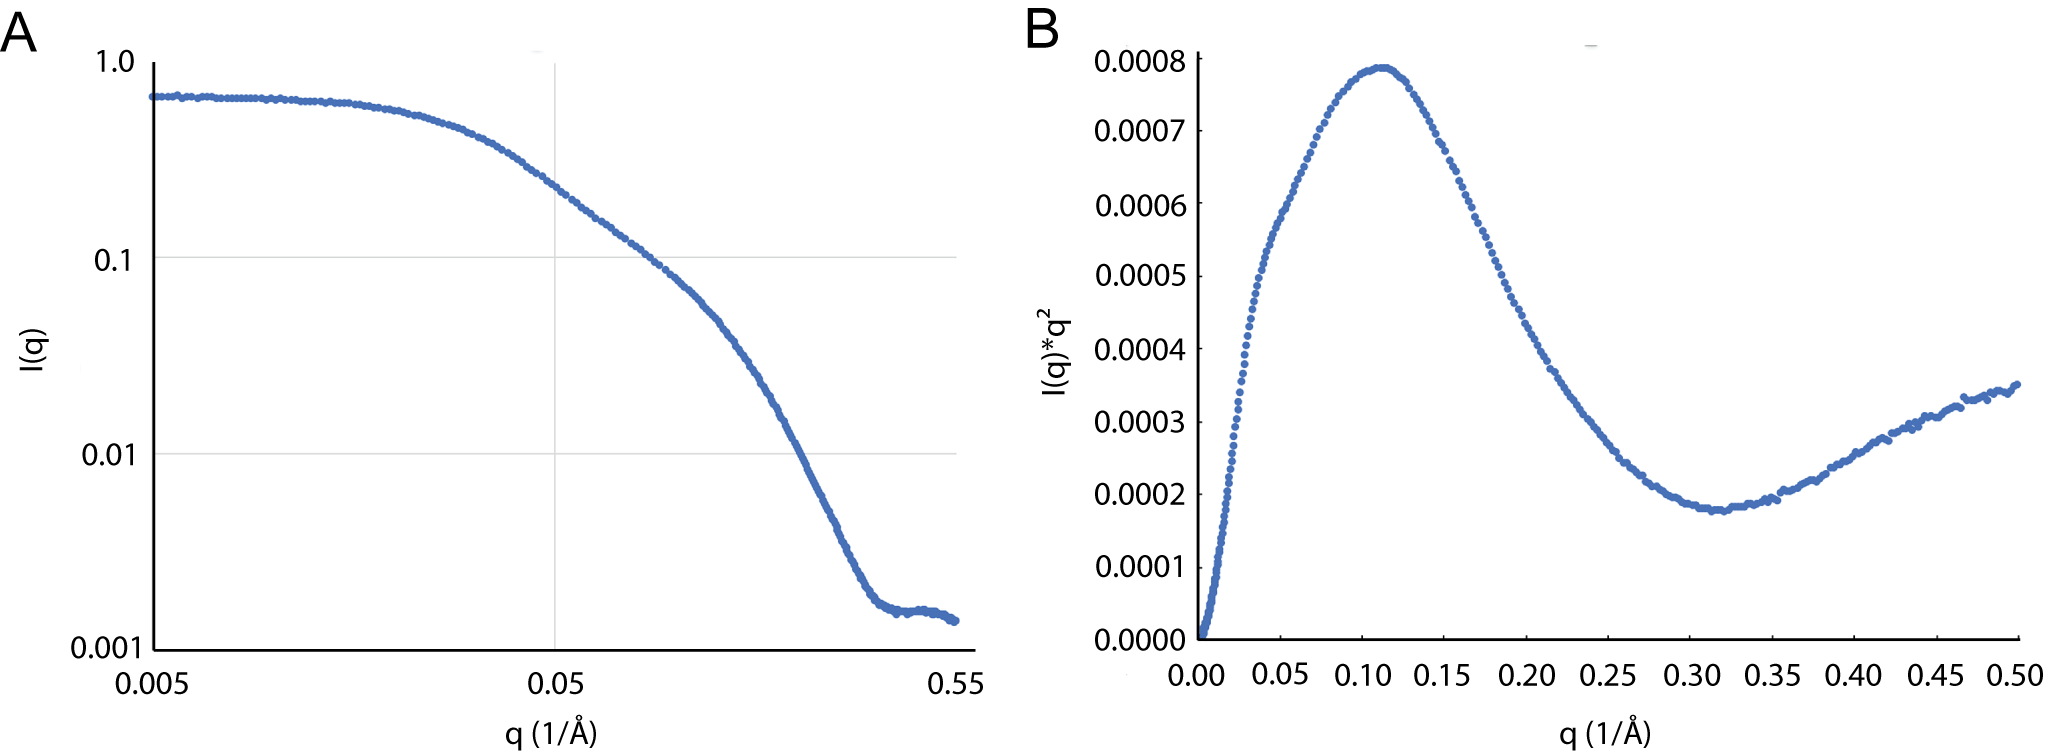
**

**Supplementary Figure 1. Small angle X-ray scattering of the *Burkholderia* Guanidine-I riboswitch.** (A) Radially averaged scattering intensity vs scattering vector. (B) Kratky plot of data from panel (A).


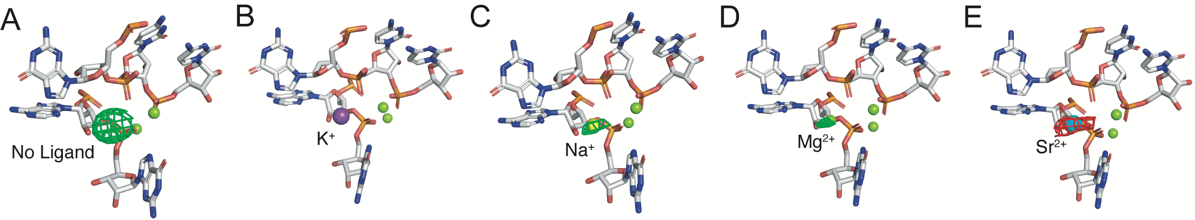


**Supplementary Figure 2. |*F*o|-|*F*c| electron density maps at the third metal ion (MC).** Positive and negative (green and red mesh, respectively) difference Fourier synthesis peaks (contoured at 2 s.d.) resulting from refinements performed in (A) the absence of a modeled ligand, (B) K+, (C) Na+, (D) Mg2+, and (E) Sr2+. For clarity, electron density is shown only within 2 Å of the location of MC.
